# Supplementary material for: Variation of redox activity and synergistic effect for improving the preferential oxidation of CO in H2-rich gases in porous Pt/CeO2–Co3O4 catalysts
Source: Royal Society of Chemistry journal article supplement (doi:10.1039/c5cy00974j), 2015-01-01
Supplement: c5cy00974j1.pdf [file c5cy00974j1.pdf]

**Supporting information**

**Variation of Redox Activity and Synergistic Effect for Improving  
Preferential Oxidation of CO in H<sub>2</sub>-rich Gases in Porous Pt/CeO<sub>2</sub>-  
Co<sub>3</sub>O<sub>4</sub> Catalysts**

Baocang Liu<sup>a,b</sup>, Yongxin Liu<sup>a</sup>, Heting Hou<sup>a</sup>, Yang Liu<sup>a</sup>, Qin Wang<sup>a,b</sup>, Jun Zhang<sup>a,b\*</sup>

*<sup>a</sup>College of Chemistry and Chemical Engineering, Inner Mongolia University, Hohhot*

*010021, P. R. China. <sup>b</sup>Inner Mongolia Key Lab of Nanoscience and Nanotechnology, Inner*

*Mongolia University, Hohhot 010021, P. R. China Tel: 0086 471 4992175; Fax: 0086 471*

*4992278; Email:cejzhang@imu.edu.cn*

**Table S1** The compositions of macro- and meso-porous Pt/CeO<sub>2</sub>-Co<sub>3</sub>O<sub>4</sub> catalysts estimated by ICP-MS and ICP-AES measurements.

| Catalysts                                           | Theoretical             | Actual                  | Theoretical          | Actual               |
|-----------------------------------------------------|-------------------------|-------------------------|----------------------|----------------------|
|                                                     | molar ratio of<br>Co/Ce | molar ratio<br>of Co/Ce | content Pt<br>(wt.%) | content Pt<br>(wt.%) |
| Pt/CeO <sub>2</sub>                                 | 0:1                     | 0:1                     | 3                    | 1.75                 |
|                                                     | 7:3                     | 5.7:3                   | 3                    | 1.37                 |
| Pt/CeO <sub>2</sub> -Co <sub>3</sub> O <sub>4</sub> | 1:1                     | 0.9:1                   | 3                    | 1.68                 |
|                                                     | 1:4                     | 1:4.4                   | 3                    | 1.64                 |
| Pt/Co <sub>3</sub> O <sub>4</sub>                   | 1:0                     | 1:0                     | 3                    | 2.07                 |

**Table S2** The BET property of macro- and meso-porous CeO<sub>2</sub>-Co<sub>3</sub>O<sub>4</sub> supports and macro- and meso-porous Pt/CeO<sub>2</sub>-Co<sub>3</sub>O<sub>4</sub> catalysts.

| Supports and Catalysts                                   | $S_{BET}(\text{m}^2 \cdot \text{g}^{-1})$ | $V_p(\text{cm}^3 \cdot \text{g}^{-1})$ | $D_p(\text{nm})$ |
|----------------------------------------------------------|-------------------------------------------|----------------------------------------|------------------|
| CeO <sub>2</sub>                                         | 72                                        | 0.13                                   | 3.7              |
| Pt/CeO <sub>2</sub>                                      | 66                                        | 0.11                                   | 3.6              |
| (7:3)CeO <sub>2</sub> -Co <sub>3</sub> O <sub>4</sub>    | 62                                        | 0.18                                   | 3.6              |
| Pt/(7:3)CeO <sub>2</sub> -Co <sub>3</sub> O <sub>4</sub> | 57                                        | 0.16                                   | 3.3              |
| (1:1)CeO <sub>2</sub> -Co <sub>3</sub> O <sub>4</sub>    | 58                                        | 0.19                                   | 3.2              |
| Pt/(1:1)CeO <sub>2</sub> -Co <sub>3</sub> O <sub>4</sub> | 54                                        | 0.14                                   | 3.1              |
| (1:4)CeO <sub>2</sub> -Co <sub>3</sub> O <sub>4</sub>    | 51                                        | 0.24                                   | 3.2              |
| Pt/(1:4)CeO <sub>2</sub> -Co <sub>3</sub> O <sub>4</sub> | 46                                        | 0.23                                   | 3.2              |
| Co <sub>3</sub> O <sub>4</sub>                           | 29                                        | 0.24                                   | 2.2              |
| Pt/Co <sub>3</sub> O <sub>4</sub>                        | 24                                        | 0.20                                   | 2.1              |

**Table S3** The nominal and actual H<sub>2</sub> consumption of reduction peaks of macro- and meso-porous Pt/CeO<sub>2</sub>-Co<sub>3</sub>O<sub>4</sub> catalysts with different Ce/Co molar ratios.

| Catalysts                                                | Nominal H <sub>2</sub> consumption                   | Actual H <sub>2</sub> consumption                    |
|----------------------------------------------------------|------------------------------------------------------|------------------------------------------------------|
|                                                          | ( $\mu\text{mol} \cdot \text{g}_{\text{Cat}}^{-1}$ ) | ( $\mu\text{mol} \cdot \text{g}_{\text{Cat}}^{-1}$ ) |
| Pt/CeO <sub>2</sub>                                      | 4.44                                                 | 3.11                                                 |
| Pt/(7:3)CeO <sub>2</sub> -Co <sub>3</sub> O <sub>4</sub> | 3.51                                                 | 4.11                                                 |
| Pt/(1:1)CeO <sub>2</sub> -Co <sub>3</sub> O <sub>4</sub> | 4.26                                                 | 7.21                                                 |
| Pt/(1:4)CeO <sub>2</sub> -Co <sub>3</sub> O <sub>4</sub> | 4.21                                                 | 10.4                                                 |
| Pt/Co <sub>3</sub> O <sub>4</sub>                        | 5.31                                                 | 102.1                                                |

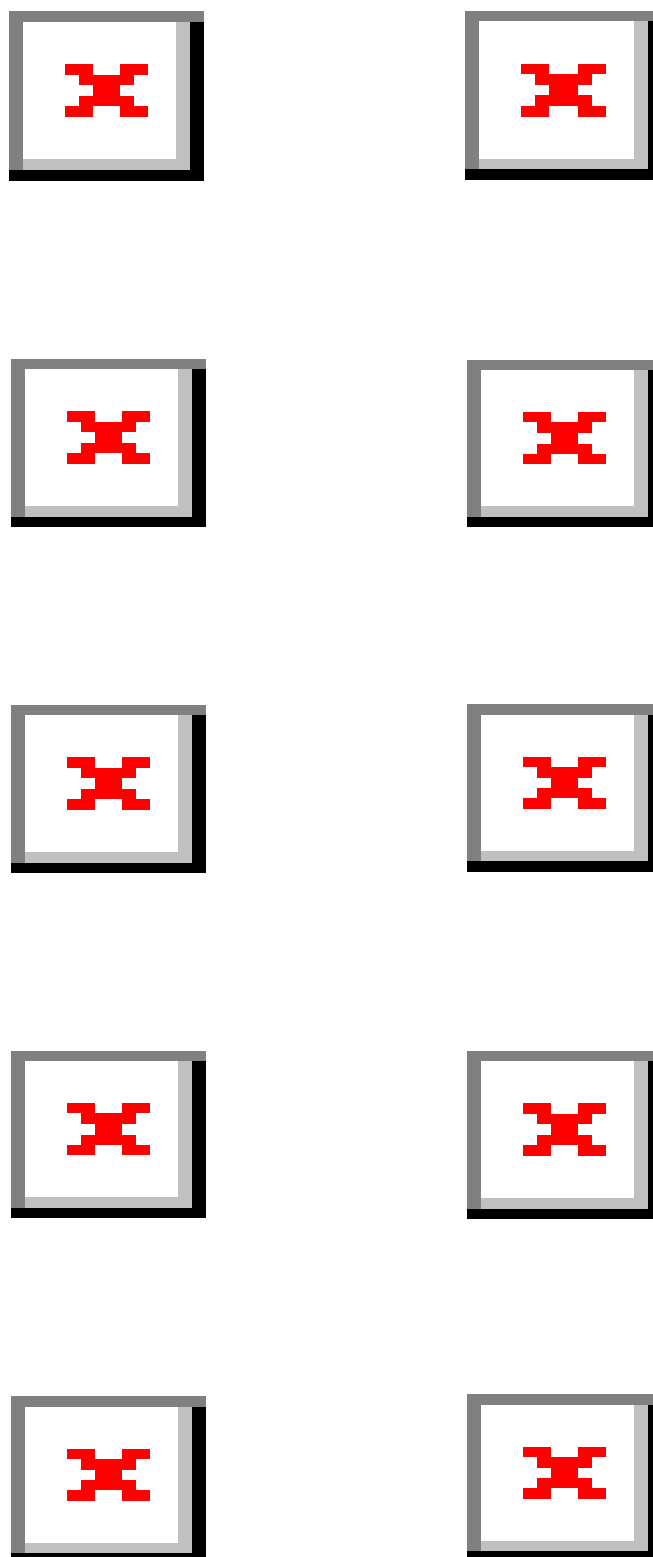

**Fig.S1** SEM images of macro- and meso-porous  $\text{CeO}_2\text{-Co}_3\text{O}_4$  supports with various molar ratios of Ce/Co at (a and b) 1:0, (c and d) 7:3, (e and f) 1:1, (g and h) 1:4, and (I and j) 0:1.

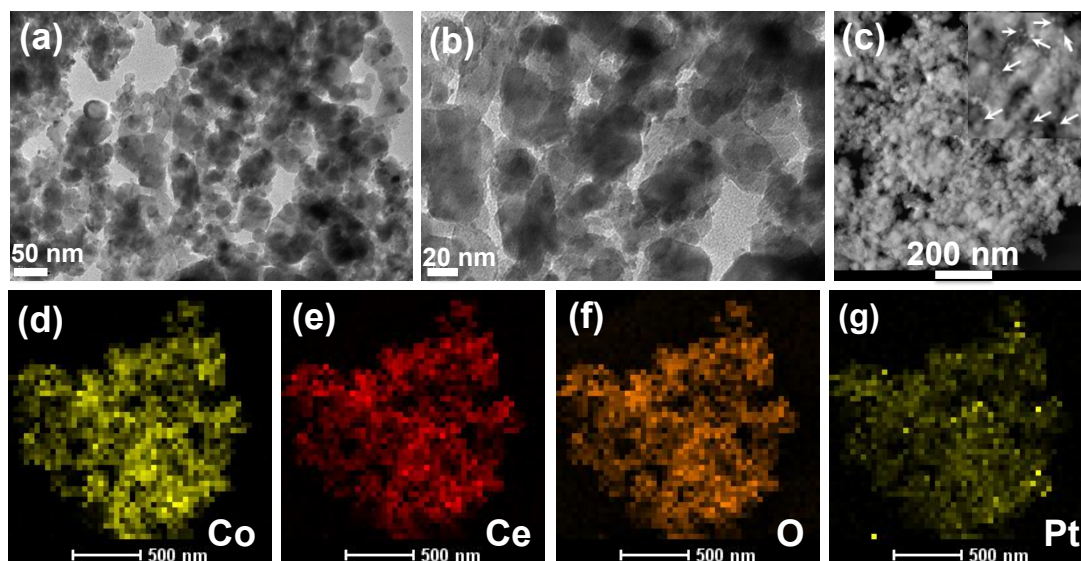

**Fig. S2** (a and b) TEM images of powder Pt/(1:4) CeO<sub>2</sub>-Co<sub>3</sub>O<sub>4</sub> catalyst; the black spots indicated by arrows are Pt nanoparticles. (c) HAADF-STEM image of powder Pt/(1:4) CeO<sub>2</sub>-Co<sub>3</sub>O<sub>4</sub> catalyst; the light spots indicated by arrows are Pt nanoparticles. The inset image of (c) is the magnified STEM image of powder Pt/(1:4) CeO<sub>2</sub>-Co<sub>3</sub>O<sub>4</sub> catalyst. (d-g) EDX elemental mapping of Co, Ce, O, and Pt in powder Pt/(1:4)CeO<sub>2</sub>-Co<sub>3</sub>O<sub>4</sub> catalyst.

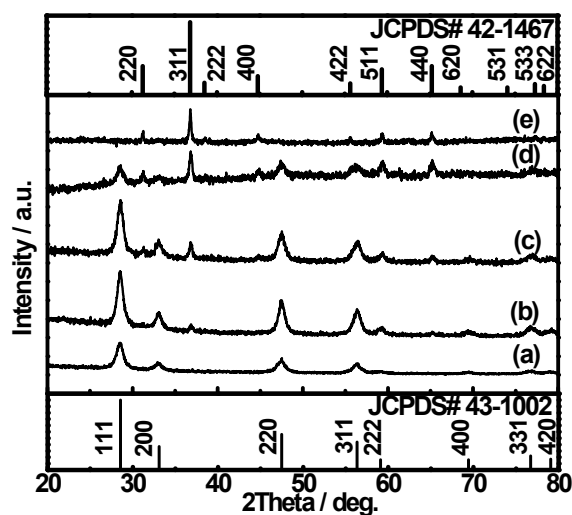

**Fig.S3** XRD patterns of powder Pt/CeO<sub>2</sub>-Co<sub>3</sub>O<sub>4</sub> catalysts with various Ce/Co molar ratios at (a) 0:1, (b) 1:4, (c) 1:1, (d) 7:3, and (e) 1:0.

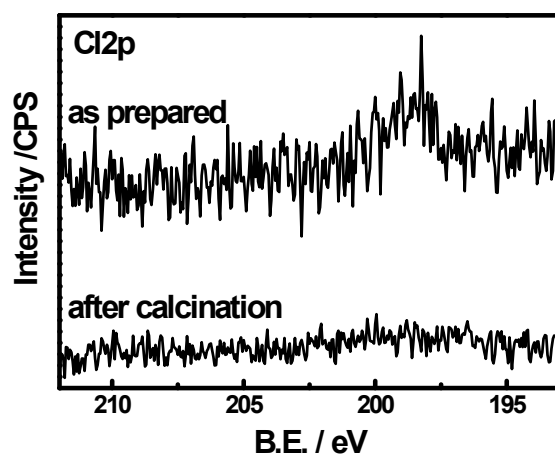

**Fig.S4** XPS spectra of as prepared macro- and meso-porous Pt/(1:4)CeO<sub>2</sub>-Co<sub>3</sub>O<sub>4</sub> catalyst and macro- and meso-porous Pt/(1:4)CeO<sub>2</sub>-Co<sub>3</sub>O<sub>4</sub> catalyst after calcination at 450 °C.

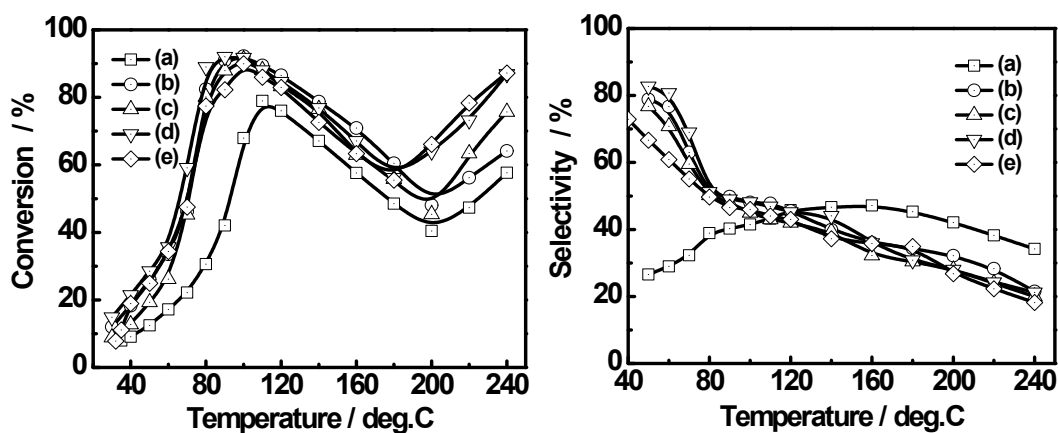

**Fig.S5** CO conversion (left) and CO<sub>2</sub> selectivity (right) of CO PROX reaction in H<sub>2</sub>-rich gases on powder (a) Pt/CeO<sub>2</sub>, (b) Pt/(7:3)CeO<sub>2</sub>-Co<sub>3</sub>O<sub>4</sub>, (c) Pt/(1:1)CeO<sub>2</sub>-Co<sub>3</sub>O<sub>4</sub>, (d) Pt/(1:4)CeO<sub>2</sub>-Co<sub>3</sub>O<sub>4</sub>, and (e) Pt/Co<sub>3</sub>O<sub>4</sub> catalysts.

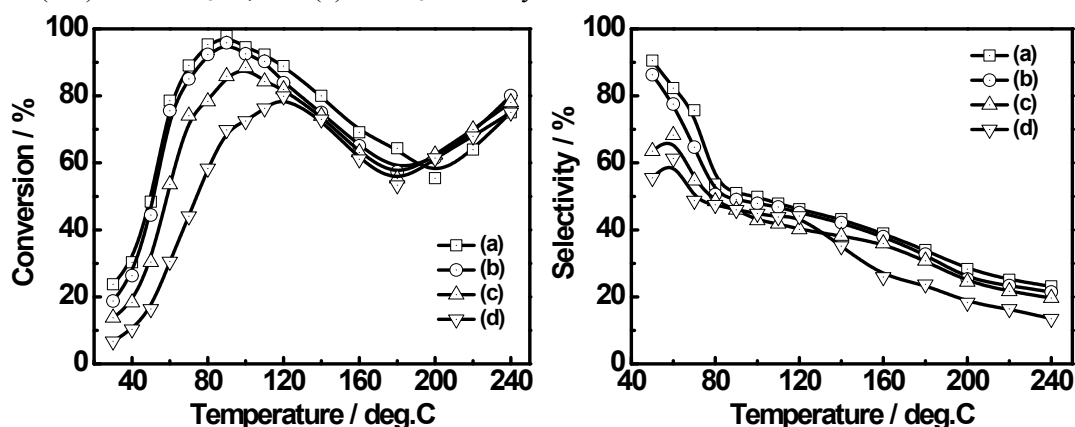

**Fig.S6** CO conversion (left) and CO<sub>2</sub> selectivity (right) of CO PROX reaction in H<sub>2</sub>-rich gases on macro- and meso-porous Pt/(1:4)CeO<sub>2</sub>-Co<sub>3</sub>O<sub>4</sub> performed under different space velocities at (a) 18,000, (b) 30,000, (c) 60,000, and (d) 90,000 mL·g<sup>-1</sup>·h<sup>-1</sup>.

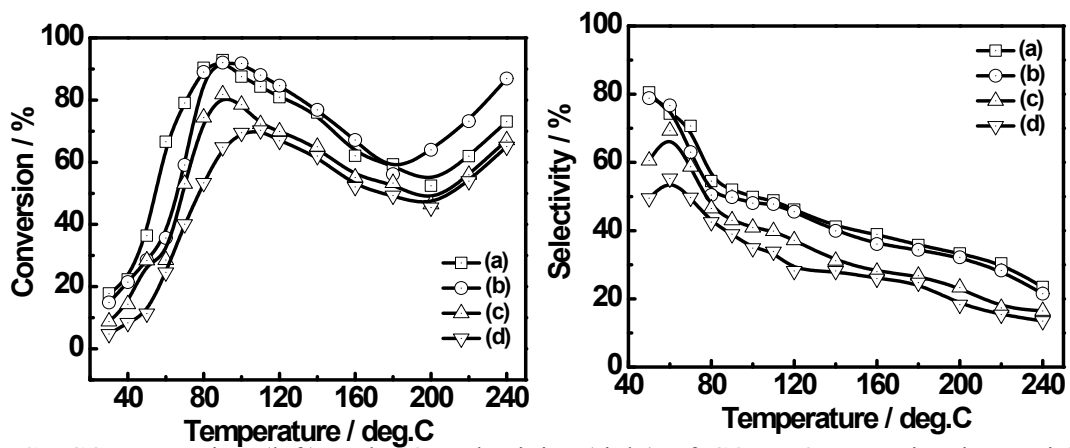

**Fig.S7** CO conversion (left) and CO<sub>2</sub> selectivity (right) of CO PROX reaction in H<sub>2</sub>-rich gases on powder Pt/(1:4)CeO<sub>2</sub>-Co<sub>3</sub>O<sub>4</sub> catalysts performed under different space velocities of (a) 18,000, (b) 30,000, (c) 60,000, and (d) 90,000 mL·g<sup>-1</sup>·h<sup>-1</sup>.
